# Supplementary material
Source: PubMed Central journal article supplement (PMC3659420)

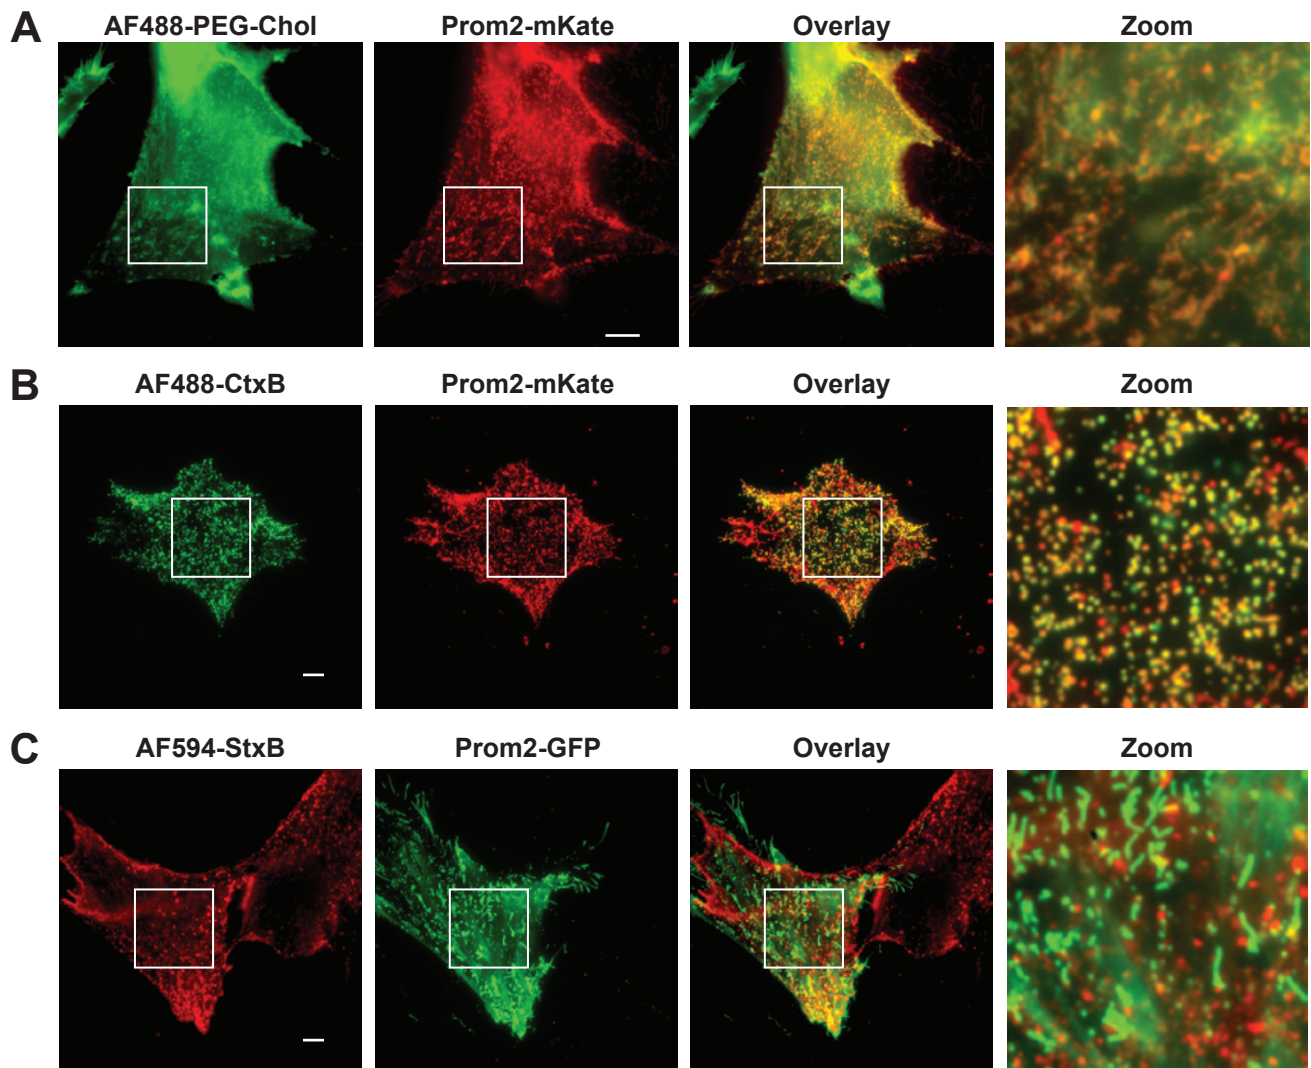

Singh et al. Suppl. Fig. 1

Supplement: NIHMS467934-supplement-01.pdf [file NIHMS467934-supplement-01.pdf]

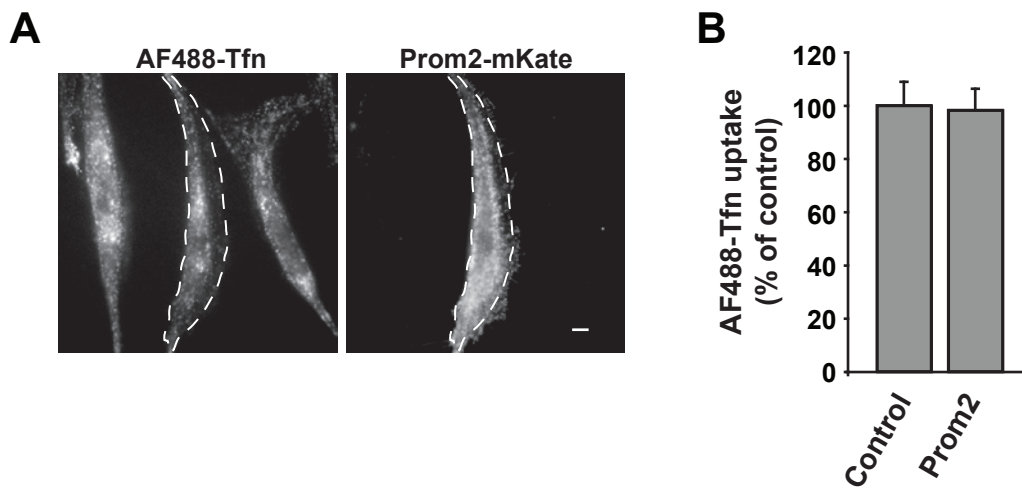

Supplement: NIHMS467934-supplement-02.pdf [file NIHMS467934-supplement-02.pdf]
